# Supplementary material for: Community Structures and Antifungal Activity of Root-Associated Endophytic Actinobacteria in Healthy and Diseased Cucumber Plants and Streptomyces sp. HAAG3-15 as a Promising Biocontrol Agent
Source: PubMed Central journal article supplement (PMC7074843; doi:10.3390/microorganisms8020236), 2020-02-10
Supplement: microorganisms-08-00236-s001.pdf [file microorganisms-08-00236-s001.pdf]

# Community Structures and Antifungal Activity of Root-Associated Endophytic Actinobacteria in Healthy and Diseased Cucumber Plants and *Streptomyces* sp. HAAG3-15 as a Promising Biocontrol Agent

Peng Cao <sup>1,†</sup>, Chenxu Li <sup>1,†</sup>, Han Wang <sup>1</sup>, Zhiyin Yu <sup>1</sup>, Xi Xu <sup>1</sup>, Xiangjing Wang <sup>1</sup>, Junwei Zhao <sup>1,\*</sup> and Wensheng Xiang <sup>1,2,\*</sup>

<sup>1</sup> Key Laboratory of Agricultural Microbiology of Heilongjiang Province, Northeast Agricultural University, No. 600 Changjiang Road, Xiangfang District, Harbin 150030, China; cp511@126.com (P.C.); licx95@126.com (C.L.); wanghan507555536@gmail.com (H.W.); yuzhiyin123@foxmail.com (Z.Y.); xuxi1758899581@163.com (X.X.); wangneau2013@163.com (X.W.)

<sup>2</sup> State Key Laboratory for Biology of Plant Diseases and Insect Pests, Institute of Plant Protection, Chinese Academy of Agricultural Sciences, Beijing100193, China

\* Correspondence: guyan2080@126.com (J.Z.); xiangwensheng@neau.edu.cn (W.X.)

† These authors contributed equally to this work.

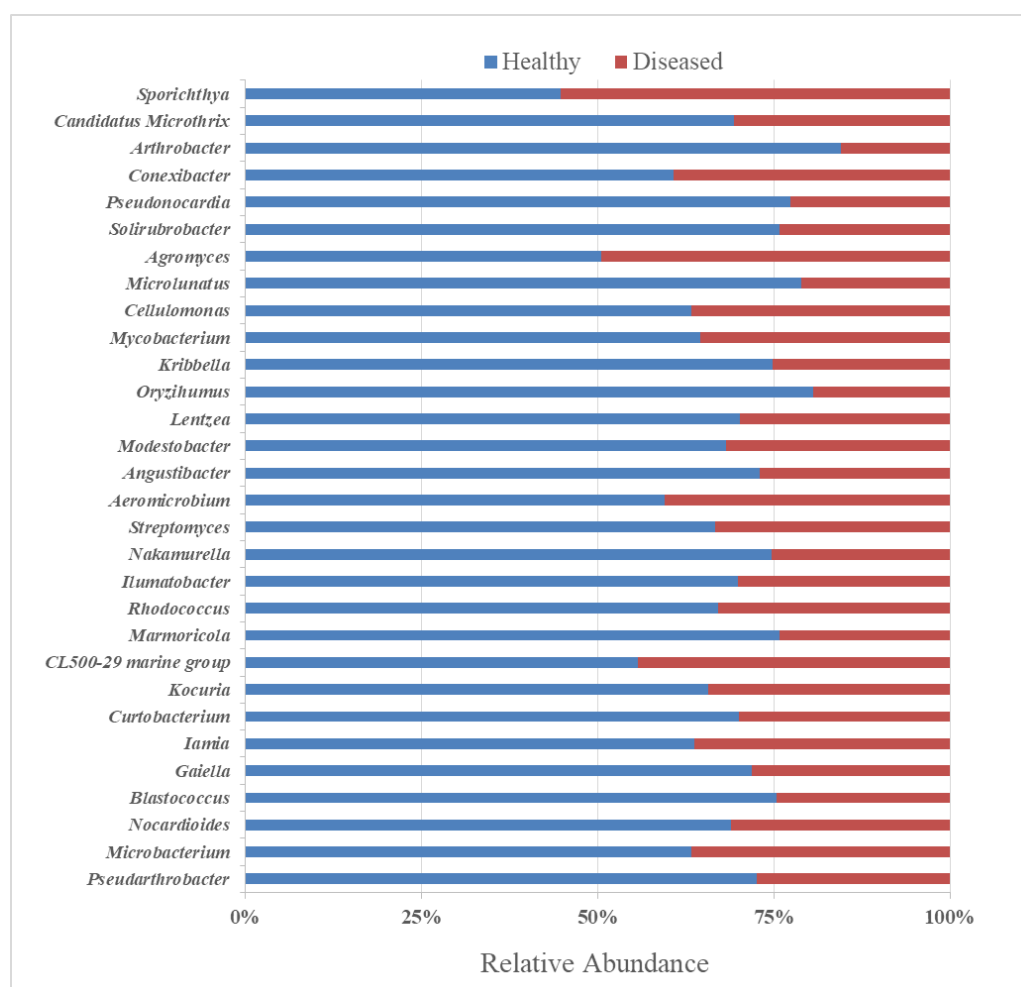

**Figure S1.** Analysis of culture-independent endophytic actinobacteria communities at genus level top 30 in the cucumber roots.

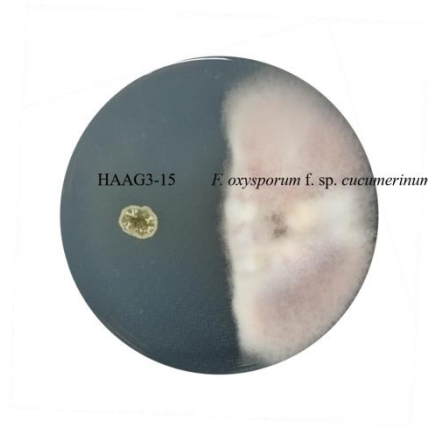

Figure S2. Strain HAAG3-15 showed antagonism to *F. oxysporum* f. sp. *cucumerinum*.

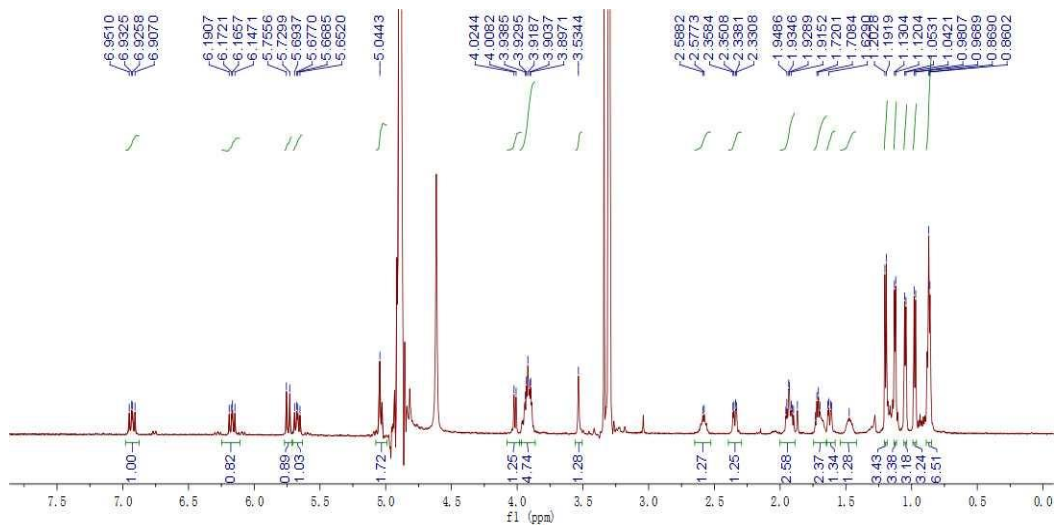

Figure S3. <sup>1</sup>H NMR (600 MHz) spectrum of compound 1 in MeOD.

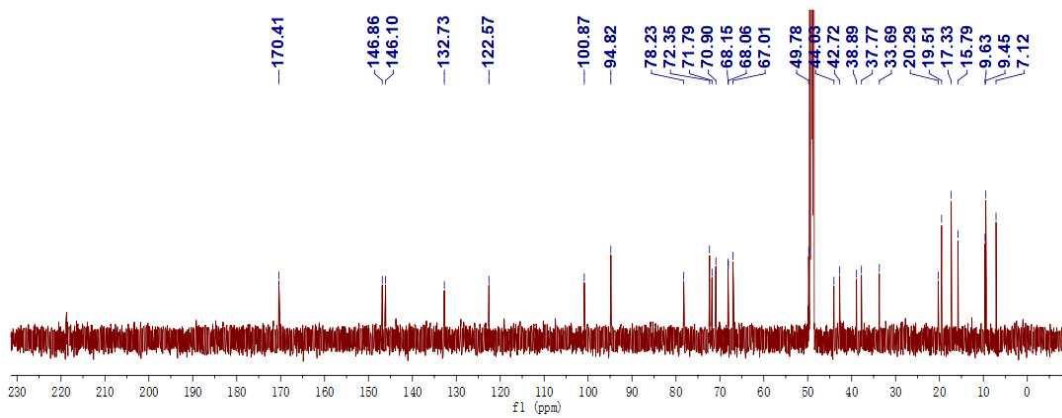

Figure S4. <sup>13</sup>C NMR (150 MHz) spectrum of compound 1 in MeOD.

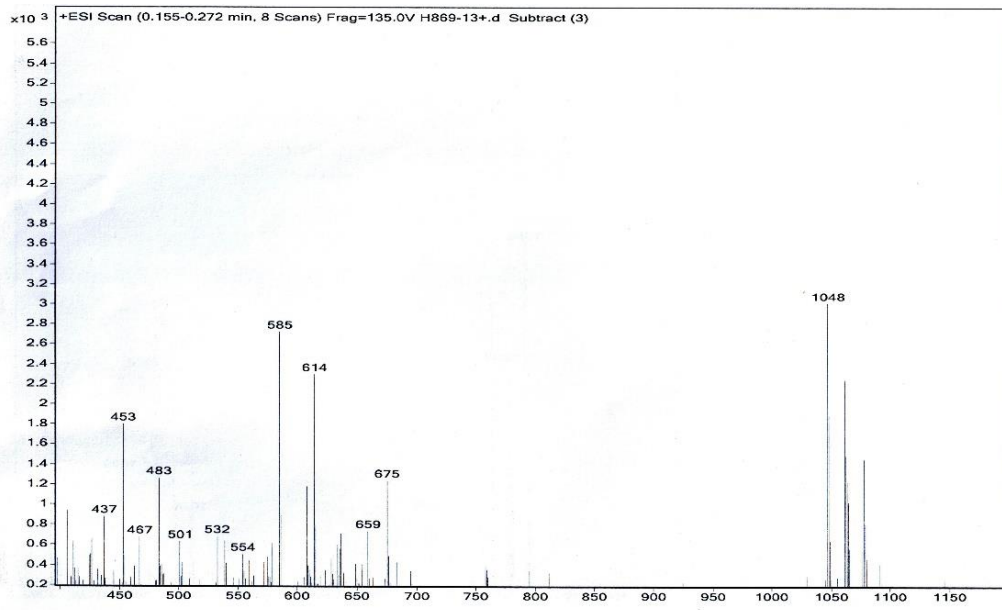

Figure S5. ESI-MS spectrum of compound 1.
